# Supplementary material for: Protective role of cellular prion protein against TNFα-mediated inflammation through TACE α-secretase
Source: PubMed Central journal article supplement (PMC5550509; doi:10.1038/s41598-017-08110-x), 2017-08-09

## SUPPLEMENTARY INFORMATIONS

### Protective role of cellular prion protein against TNF $\alpha$ -mediated inflammation through TACE $\alpha$ -secretase

Juliette Ezpeleta, François Boudet-Devaud, Mathéa Pietri, Anne Baudry, Vincent Baudouin, Aurélie Alleaume-Butaux, Nathalie Dagoneau, Odile Kellermann, Jean-Marie Launay and Benoit Schneider

Supplementary Figure 1

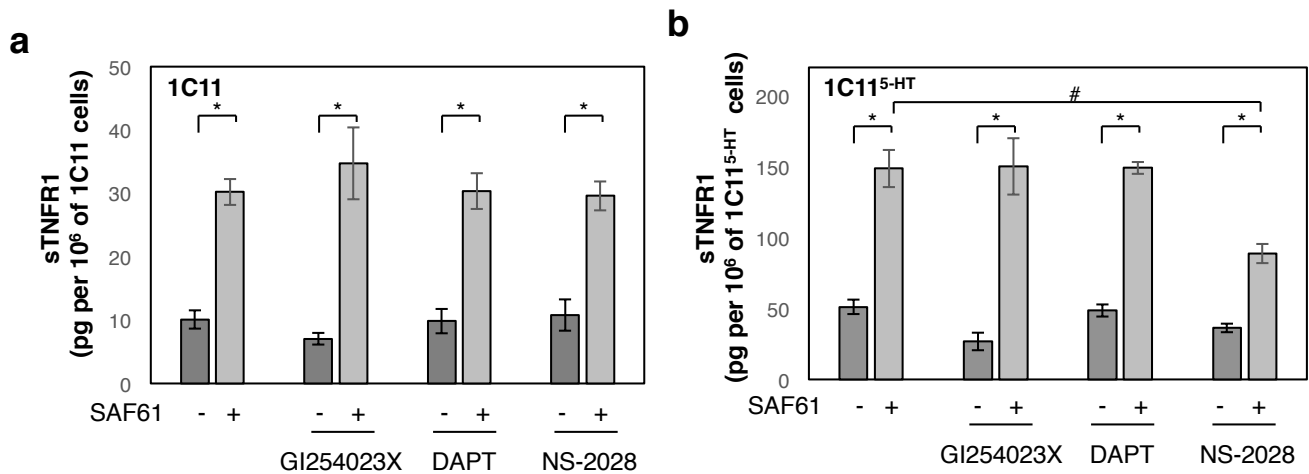

**Supplementary Figure 1: Impact of the inhibition of guanylate cyclase, ADAM10 or  $\gamma$ -secretase on PrP<sup>C</sup>-stimulated TNFR1 ectodomain shedding.** ELISA-based measure of sTNFR1 concentration in the cell culture medium of 1C11 (a) and 1C11<sup>5-HT</sup> (b) cells treated with SAF61 PrP antibody (10  $\mu\text{g ml}^{-1}$ ) for 120 min in the presence or not of the guanylate cyclase inhibitor NS-2028 (1  $\mu\text{M}$ ), the ADAM10 inhibitor GI254023X (50 nM), or the  $\gamma$ -secretase inhibitor DAPT (10  $\mu\text{M}$ ). Data shown are the mean $\pm$ SEM from three experiments performed in triplicate. \* $p$ <0.01. # $p$ <0.01.

### Supplementary Figure 2

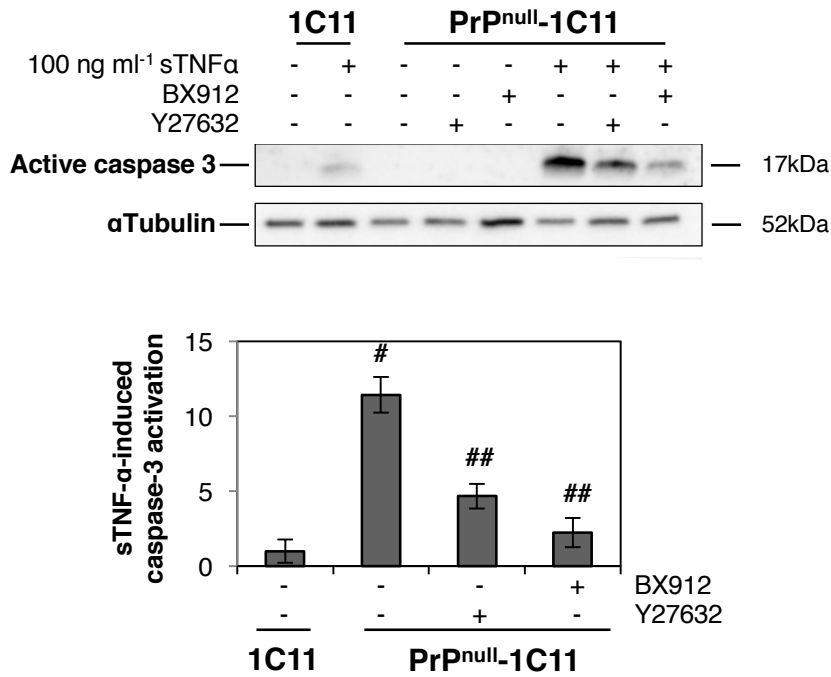

**Supplementary Figure 2: Inhibition of ROCK-I or PDK1 protects PrP<sup>null</sup>-1C11 cells from sTNF $\alpha$  toxicity.** Western blots showing a stronger activation of caspase-3 in PrP<sup>null</sup>-1C11 cells exposed to sTNF $\alpha$  (100 ng ml<sup>-1</sup>) for 120 min than in 1C11 cells. Antagonizing either ROCK-I activity with Y-27632 (100  $\mu$ M for 1h) or PDK1 activity with BX912 (1  $\mu$ M for 1h) in PrP<sup>null</sup>-1C11 cells reduces sTNF $\alpha$  toxic effect. Quantitative data are shown as the mean $\pm$ SEM from three experiments performed in triplicate. # $p$ <0.05 vs. 1C11 cells exposed to sTNF $\alpha$ ; ## $p$ <0.05 vs. PrP<sup>null</sup>-1C11 cells treated with sTNF $\alpha$ .

### Supplementary Figure 3

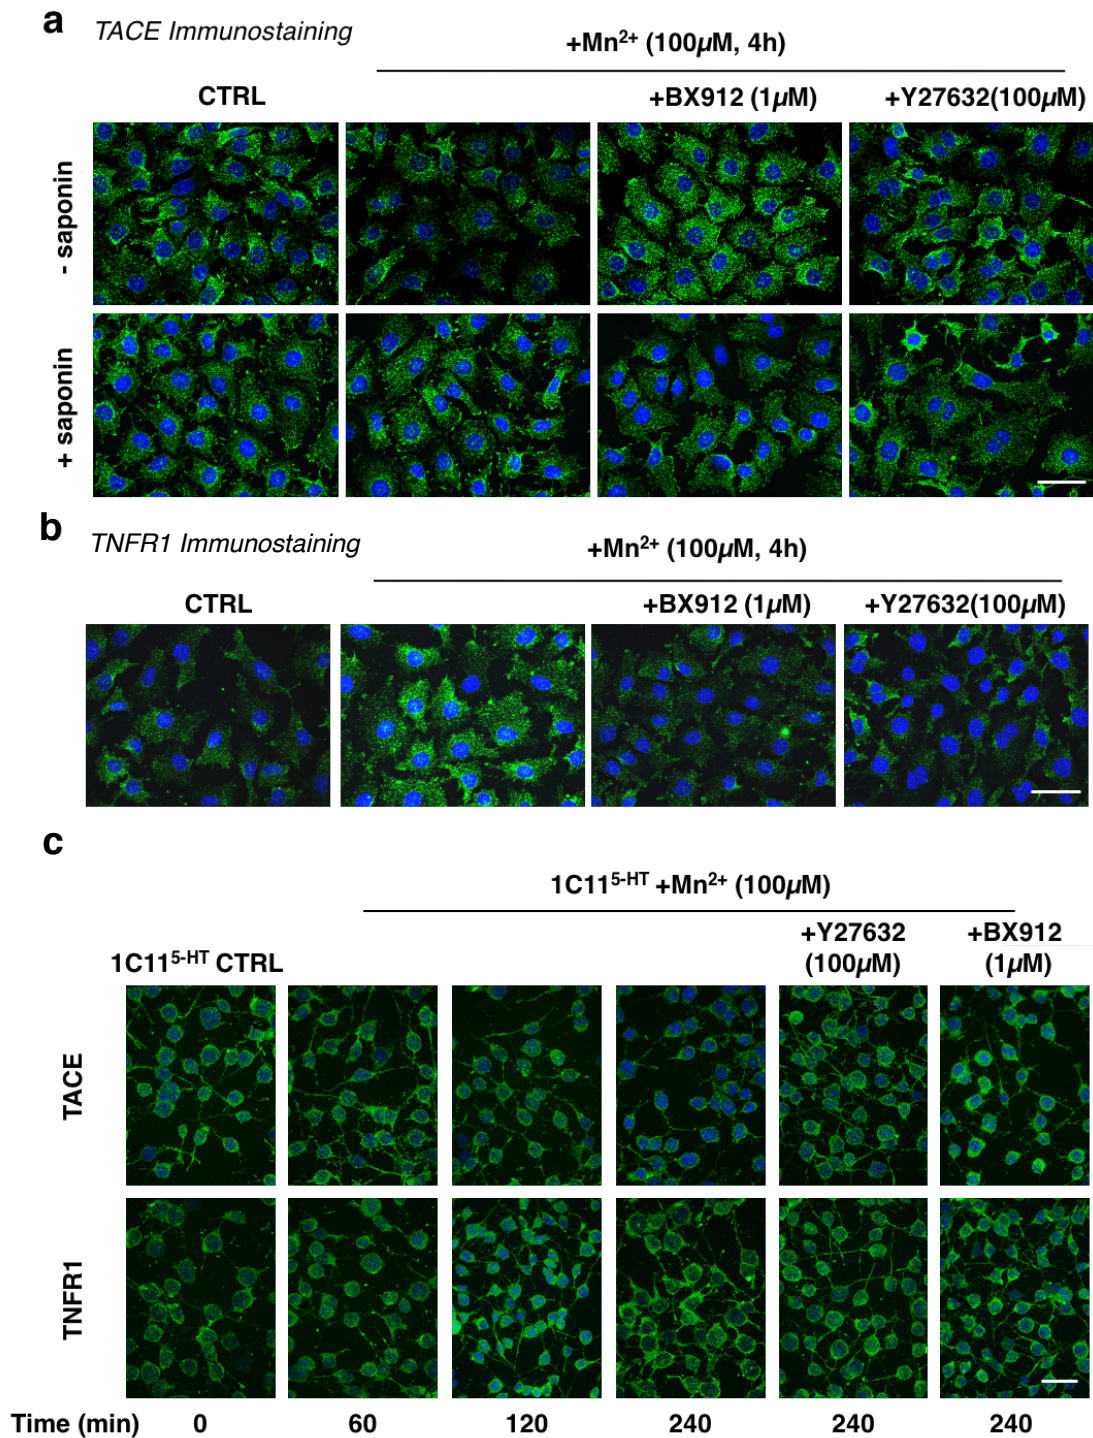

Supplementary Figure 3: Manganese-induced overstimulation of  $\beta 1$  integrin signaling triggers TACE internalization and TNFR1 shedding deficit in PrP<sup>C</sup> expressing 1C11 and 1C11<sup>5-HT</sup> cells. Immunolabeling experiments showing internalization of TACE (a) and

increase in plasma membrane TNFR1 staining **(b)** in 1C11 cells exposed to  $Mn^{2+}$  (100  $\mu M$ ) for 4h that are counteracted upon inhibition of ROCK-I with Y-27632 (100  $\mu M$ ) or PDK1 with BX912 (1  $\mu M$ ). **(c)** Time-dependent reduction of TACE level and increase of TNFR1 amount at the surface of serotonergic 1C11<sup>5-HT</sup> neuronal cells exposed to 100  $\mu M$   $Mn^{2+}$ . The inhibition of ROCK-I with Y-27632 (100  $\mu M$ ) or PDK1 with BX912 (1 $\mu M$ ) blocks  $Mn^{2+}$  effects.

## Supplementary Figure 4

### Full-length gels from Figure 2e:

|                                     | 1C11 <sup>5HT</sup> |   | PrP <sup>null</sup> -1C11 <sup>5HT</sup> |   |   |   |   |   |
|-------------------------------------|---------------------|---|------------------------------------------|---|---|---|---|---|
| 10ng ml <sup>-1</sup> sTNF $\alpha$ | -                   | + | -                                        | - | - | + | + | + |
| BX912                               | -                   | - | -                                        | - | + | - | - | + |
| Y27632                              | -                   | - | -                                        | + | - | - | + | - |

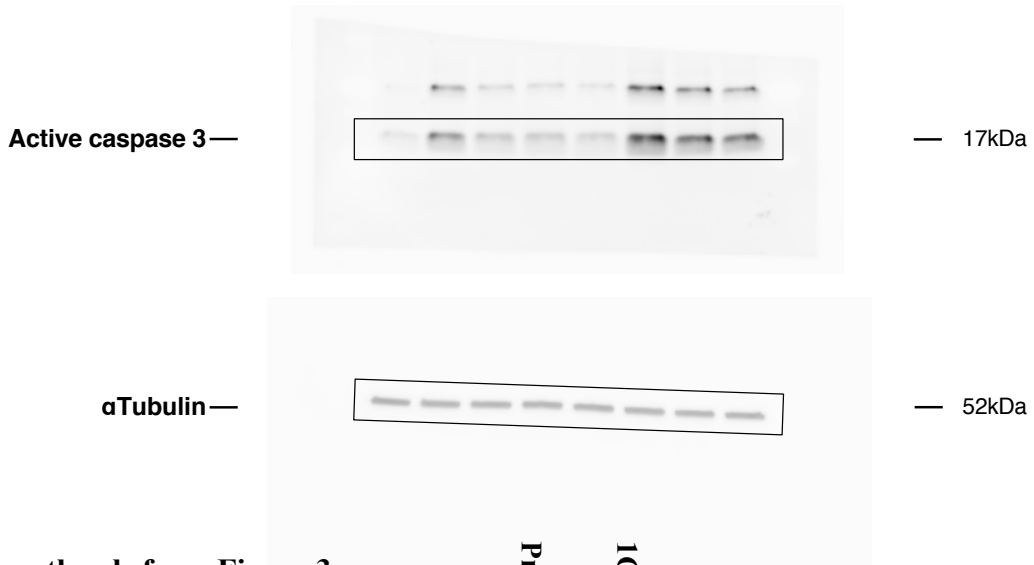

### Full-length gels from Figure 3a:

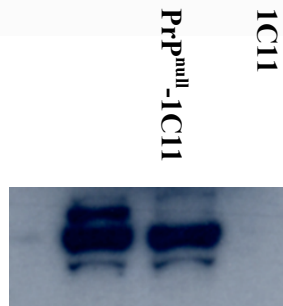

### Full-length gels from Figure 3d:

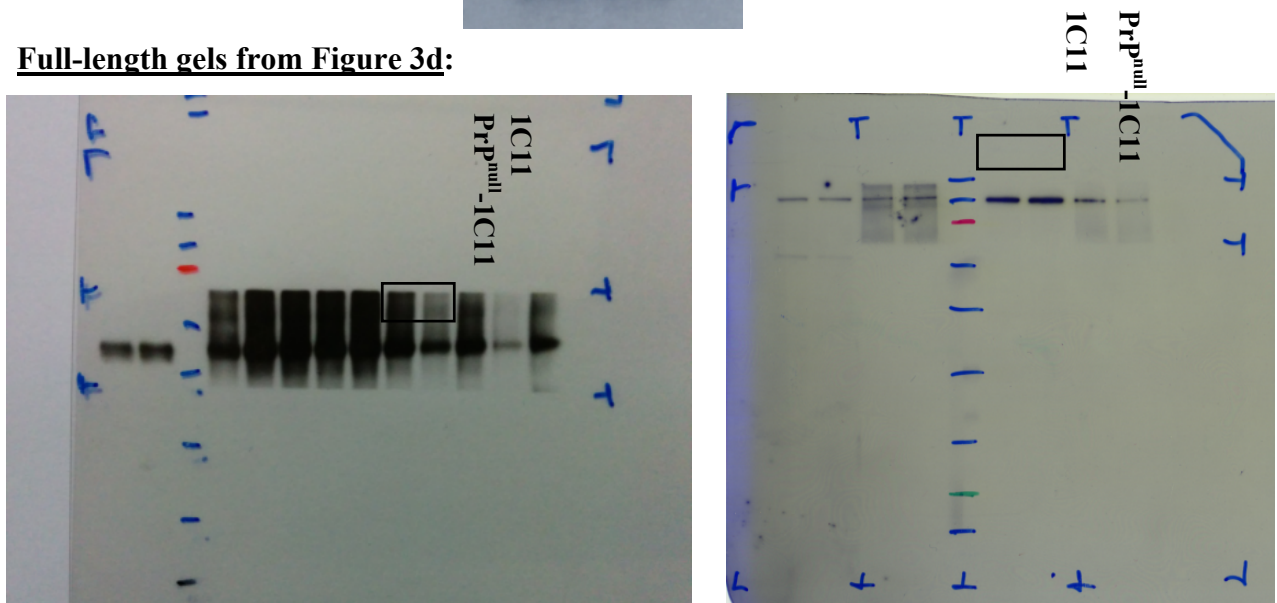

**Full-length gels from Figure 4e:**

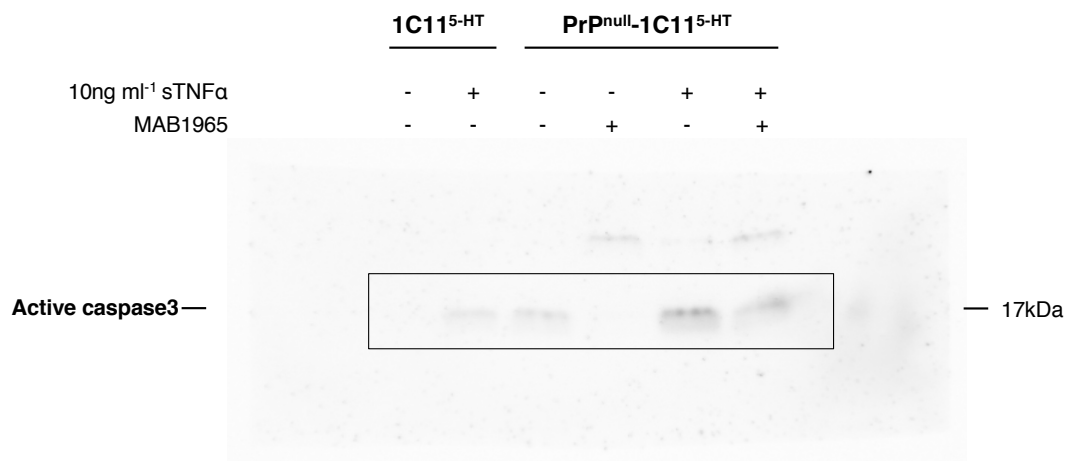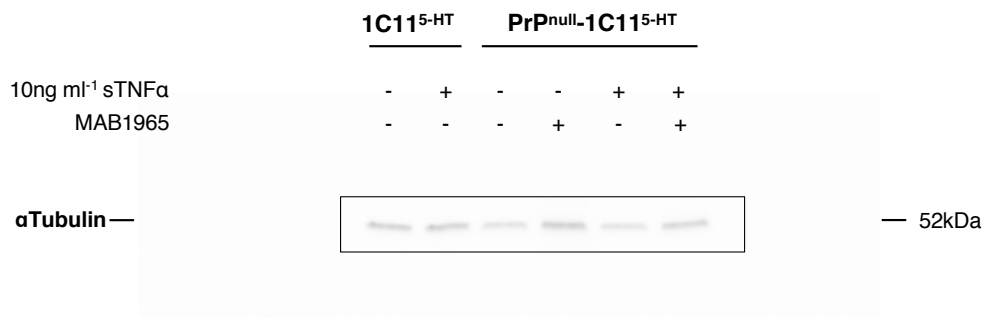

Supplement: 41598_2017_8110_MOESM1_ESM.pdf [file 41598_2017_8110_MOESM1_ESM.pdf]
